# Supplementary material for: The mRNA expression of Il6 and Pdcd1 are predictive and protective factors for doxorubicin-induced cardiotoxicity
Source: PubMed Central journal article supplement — Mol Med Rep. 2020 Dec 3;23(2):113. doi: 10.3892/mmr.2020.11752 (PMC7723161; doi:10.3892/mmr.2020.11752), 2020-12-03

Figure S1. Knockdown of (A) *Il6* and (B) *Pdcd1* by transfection with siRNA in the cardiomyocyte-derived H9c2 cell line. Knockdown efficiency was assessed by reverse-transcription quantitative PCR. Values are expressed as means  $\pm$  SEM of three samples. Relative expression was determined based on GAPDH expression. \*\* $P < 0.01$  vs. Mock cells. The protein expression of (C) IL-6 (red fluorescence) and (D) PDCD1 (green fluorescence) was determined by immunofluorescence analysis of siRNA-transfected cells (magnification, x200). *Pdcd1*, programmed cell death 1; si, small interfering.

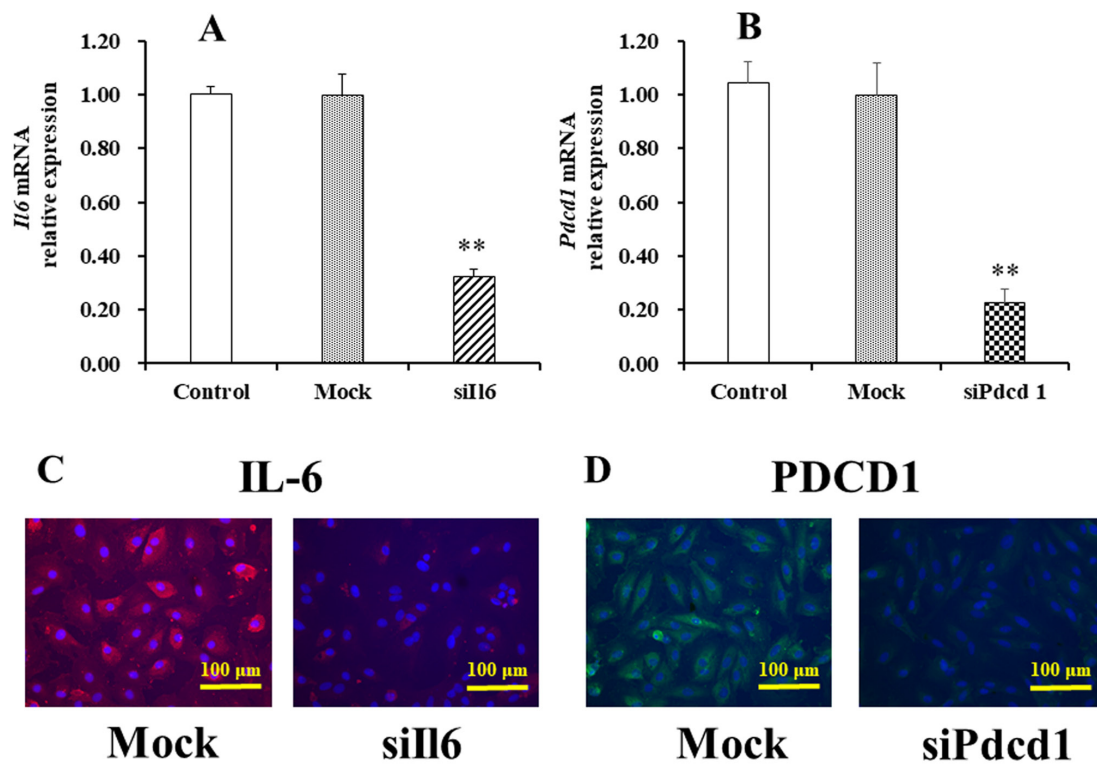

Supplement: Supplementary_Data.pdf [file Supplementary_Data.pdf]
